# Supplementary material for: Development and assessment of the physical-biogeochemical ocean regional model in the Northwest Pacific: NPRT v1.0 (ROMS v3.9–TOPAZ v2.0)
Source: Copernicus journal article supplement (doi:10.5194/egusphere-2024-1509), 2024-10-22
Supplement: Supplementary file [file egusphere-2024-1509-CC1-supplement.pdf]

## [Supplementary Figures]

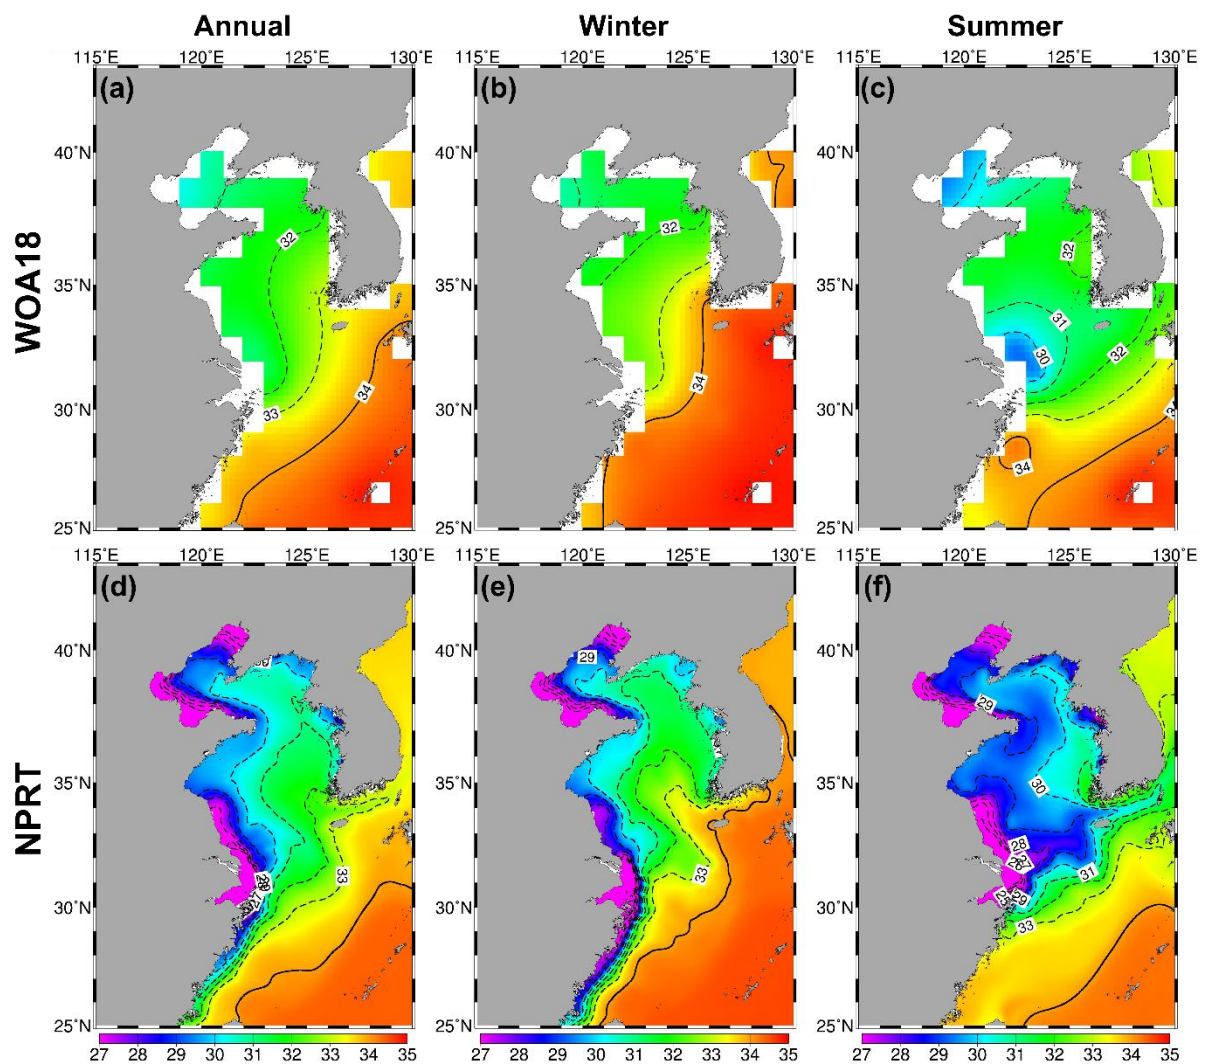

**Supplementary Figure S1.** Distributions of the surface salinity in (a, b, c) the WOA18 data and (d, e, f) NPRT for (a, d) the annual mean, (b, e) winter and (c, f) summer in the YECS. The thick solid line indicate 34.0 psu and the contour interval is 0.5 psu.
